# Supplementary material
Source: PubMed Central journal article supplement (PMC2863519)
Supplement: supp_78_5_2257__1.pdf [file supp_78_5_2257__1.pdf]

# Supplemental Figure 1

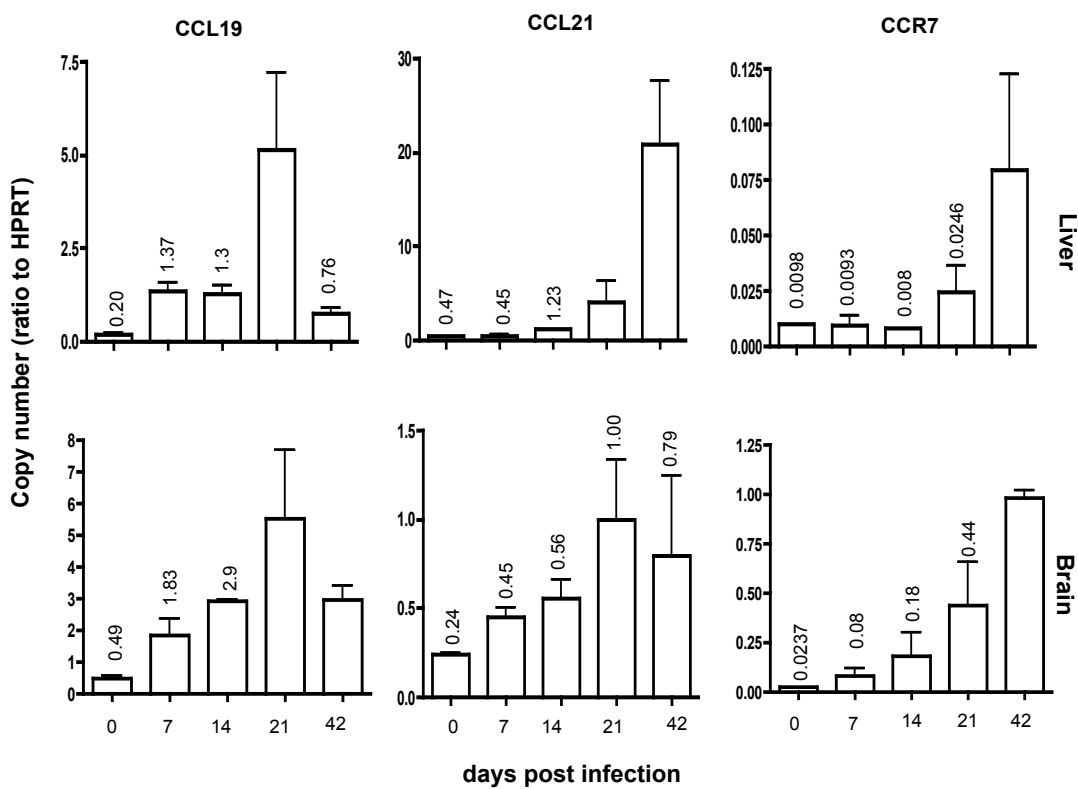

**Supplemental Figure 1.** Relative copy numbers (compared to HPRT copy number) of CCL19, CCL21 and CCR7 mRNA at day 0, 7, 14, 21 and 42 post infection. Error bars represent standard error of mean of 3 biological replicates. Mean values for the small bars are indicated above the bars.
